# Supplementary material
Source: PubMed Central journal article supplement (PMC8640395)
Supplement: flgastro-2020-101579supp001.pdf [file flgastro-2020-101579supp001.pdf]

| Study title                                                                                                                                                                  | Priority | Sponsor                                                         | Study type                             | Status     | Finished? | Published |
|------------------------------------------------------------------------------------------------------------------------------------------------------------------------------|----------|-----------------------------------------------------------------|----------------------------------------|------------|-----------|-----------|
| <b>VEST: The UK Vedolizumab Real Life Experience Study in Inflammatory Bowel Disease (VEST)</b>                                                                              | 1        | NHS Foundation trust                                            | Prospective observational cohort study | recruiting | No        | -         |
| <b>Electrical Vagal Nerve Stimulation in Ulcerative Colitis (EVASION-UC)</b>                                                                                                 | 1        | Queen Mary University of London                                 | Crossover RCT                          | recruiting | No        | -         |
| <b>Investigation of the Faecal Loss of Vedolizumab and Its Role in Influencing Serum Drug Levels, Outcomes and Response in Ulcerative Colitis (FAVOUR)</b>                   | 1        | Guy's and St Thomas' NHS Foundation Trust                       | Open label clinical trial              | recruiting | No        | -         |
| <b>Study of the Golimumab Exposure-Response Relationship Using Serum Trough Levels (GO-LEVEL)</b>                                                                            | 1        | Guy's and St Thomas' NHS Foundation Trust                       | Open label clinical trial              | recruiting | No        | -         |
| <b>Autologous Stem cell Transplantation In refractory Crohn's disease – Low Intensity Therapy Evaluation (ASTIClite)</b>                                                     | 1        | Barts Health NHS Trust                                          | RCT                                    | recruiting | No        | -         |
| <b>The PRognostic Effect of Environmental Factors in Crohn's and Colitis (PREdiCct)</b>                                                                                      | 2a, 10   | University of Edinburgh                                         | Prospective observational cohort study | recruiting | No        | -         |
| <b>Faecal Calprotectin as a Potential Non-invasive Inflammatory Marker in Pregnancy and Inflammatory Bowel Disease (PREGCAL)</b>                                             | 2b       | The Royal Wolverhampton Hospitals NHS                           | Prospective observational cohort study | recruiting | No        | -         |
| <b>Small Bowel Deep Learning Algorithm Project</b>                                                                                                                           | 2b       | London North West Healthcare NHS Trust                          | Open label clinical trial              | recruiting | No        | -         |
| <b>The ADDapt Diet in Reducing Crohn's Disease Inflammation</b>                                                                                                              | 3        | King's College London                                           | RCT                                    | recruiting | No        | -         |
| <b>The Feasibility of Following the Crohn's Diet</b>                                                                                                                         | 3        | King's College London                                           | clinical trial not further specified   | finished   | Yes       | No        |
| <b>Management of diarrhoea in patients with stable ulcerative colitis: multi-arm multi-stage trial of low FODMAP diet amitriptyline ondansetron or loperamide (MODULATE)</b> | 3, 6     | NIHR Evaluation Trials and Studies Coordinating Centre (NETSCC) | RCT                                    | unclear    | No        | -         |
| <b>Understanding Abdominal Pain in IBD and IBS</b>                                                                                                                           | 4        | Guy's and St Thomas' NHS Foundation Trust                       | Crossover RCT                          | recruiting | No        | -         |

|                                                                                                                                                                                                         |         |                                                                                               |                                            |                      |                   |                           |
|---------------------------------------------------------------------------------------------------------------------------------------------------------------------------------------------------------|---------|-----------------------------------------------------------------------------------------------|--------------------------------------------|----------------------|-------------------|---------------------------|
| <b>A supported online self-management for symptoms of fatigue, pain and urgency/incontinence in people with inflammatory bowel disease: the IBD-BOOST trial</b>                                         | 4, 6, 8 | National Institute of Health Research (NIHR) Programme Grant for Applied Research (PGfAR), UK | observational cohort study - not specified | recruiting           | No                | -                         |
| <b>Anorectal Function in Perianal Crohn's Disease</b>                                                                                                                                                   | 5       | The Leeds Teaching Hospitals NHS Trust                                                        | Prospective observational cohort study     | recruiting           | No                | -                         |
| <b>MR Assessment of Perianal Crohn's Disease (MAP)</b>                                                                                                                                                  | 5       | University of Nottingham                                                                      | Prospective observational cohort study     | Unknown              | -                 | -                         |
| <b>CD-TREAT Diet: a Novel Therapy for Active Luminal Crohn's Disease</b>                                                                                                                                | 7       | NHS Greater Glasgow and Clyde                                                                 | Open label clinical trial                  | recruiting           | No                | -                         |
| <b>Non-invasive Approaches to Identify the Cause of Fatigue in Inflammatory Bowel Disease Patients (IBD Fatigue)</b>                                                                                    | 8       | University of Nottingham                                                                      | Open label clinical trial                  | recruiting           | No                | -                         |
| <b>Cognitive-behavioural therapy for the management of inflammatory bowel disease-fatigue: a feasibility randomised controlled trial</b>                                                                | 8       | King's College London                                                                         | RCT                                        | pilot trial finished |                   | Yes (pilot trial 12/2019) |
| <b>Cost-effectiveness of laparoscopic ileocaecal resection versus infliximab treatment of terminal ileitis in Crohn's disease: the LIRIC Trial.</b>                                                     | 9       | The Amsterdam Medical Centre                                                                  | RCT                                        | finished             | Yes               | Yes                       |
| <b>STOP-Colitis pilot trial protocol: a prospective, open-label, randomised pilot study to assess two possible routes of faecal microbiota transplant delivery in patients with ulcerative colitis.</b> | 10      | National Institute for Health Research (UK)                                                   | RCT                                        | recruiting           | Yes (pilot trial) | Yes (pilot trial)         |

**Supplementary Table 1:** overview of non-pharmaceutical-driven clinical IBD studies in adults in the UK since 09/08/2016

| Study Title                                                                                                                                                                                                                                                         | Priority | Sponsor              | Study Type                | Status   |
|---------------------------------------------------------------------------------------------------------------------------------------------------------------------------------------------------------------------------------------------------------------------|----------|----------------------|---------------------------|----------|
| <b>Exploratory Trial to Assess Mechanism of Action, Clinical Effect, Safety and Tolerability of 12 Weeks of Treatment With BI 655130 in Patients With Active Ulcerative Colitis (UC)</b>                                                                            | 1        | Boehringer Ingelheim | Open label clinical trial | finished |
| <b>GSK2982772 Study in Subjects With Ulcerative Colitis</b>                                                                                                                                                                                                         | 1        | GlaxoSmithKline      | RCT                       | finished |
| <b>Vedolizumab IV 300 mg in the Treatment of Fistulizing Crohn's Disease (ENTERPRISE)</b>                                                                                                                                                                           | 5        | Takeda               | RCT                       | finished |
| <b>A Phase 2a, Randomised, Double-Blind, Placebo-Controlled Study to Evaluate the Safety/Tolerability and Efficacy of TOP1288 200 mg Rectal Solution Once Daily for 4 Weeks in Symptomatic Ulcerative Colitis Patients with Moderate to Severe Disease Activity</b> | 1        | Topivert Pharma Ltd  | RCT                       | finished |
| <b>Study for Safety and Tolerability of TOP1288 Administered Orally in Healthy Subjects</b>                                                                                                                                                                         | 1        | Topivert Pharma Ltd  | RCT                       | finished |
| <b>Open-label V565 Target Engagement Study</b>                                                                                                                                                                                                                      | 1        | VHsquared Ltd.       | Open label clinical trial | finished |

**Supplementary Table 2:** overview of completed pharmaceutical-driven clinical IBD studies in adults in the UK since 09/08/2016
